# Supplementary material
Source: publisher site journal article supplement (https://www.dovepress.com/get_supplementary_file.php?f=246103.xlsx)
Supplement: Supplementary file 1 [file get_supplementary_file.php]

## Sheet: Appendix1
APPENDIX 1 Ct values of the PMRs,and comparison between the cytological and PCR diagnosis
Sample No.1)	Ct value			Cytological diagnosis2)		PCR diagnosis4)
	PAX1	SOX1	ACTB	Type	State variable	PAX1	SOX1	PAX1+SOX1
1	45	45	25.87	LSIL	0	0	0	0
2	45	45	26.37	HSIL	1	0	0	0
3	45	45	28.22	HSIL	1	0	0	0
4	39.12	45	26.32	HSIL	1	0	0	0
5	45	45	28.33	HSIL	1	0	0	0
6	42.62	45	27.78	HSIL	1	0	0	0
7	31.49	31.27	26.11	HSIL	1	1	1	1
9	45	45	24.98	LSIL	0	0	0	0
11	43.18	45	26.87	HSIL	1	0	0	0
11	41.93	45	27.36	HSIL	1	0	0	0
14	31.11	31.43	26.5	CC	1	1	1	1
15	31.13	31.51	26.47	HSIL	1	1	1	1
16	31.33	29.19	26.46	CC	1	1	1	1
17	38.86	35.93	25.97	LSIL	0	0	1	1
18	36.86	45	25.56	HSIL	1	1	0	1
19	37.94	36.17	28.91	HSIL	1	1	1	1
21	29.51	29.45	26.55	CC	1	1	1	1
23	29.16	28.98	26.14	CC	1	1	1	1
24	32.15	31.93	27.32	CC	1	1	1	1
25	45	45	29.59	LSIL	0	0	0	0
26	39.13	45	26.65	LSIL	0	0	0	0
27	29.85	28.91	26.57	CC	1	1	1	1
28	45	45	27.12	LSIL	0	0	0	0
29	29.86	28.66	25.55	CC	1	1	1	1
31	31.26	29.46	25.77	HSIL	1	1	1	1
31	45	45	27.53	HSIL	1	0	0	0
32	31.82	31.32	26.17	HSIL	1	1	1	1
35	45	45	25.74	LSIL	0	0	0	0
36	35.55	35.18	27.57	HSIL	1	1	1	1
37	44.31	45	25.57	HSIL	1	0	0	0
38	43.96	45	28.13	LSIL	0	0	0	0
39	31.56	31.13	26.61	HSIL	1	1	1	1
41	45	45	26.78	LSIL	0	0	0	0
45	45	45	26.8	HSIL	1	0	0	0
48	31.23	31.11	27.62	HSIL	1	1	1	1
49	37.69	45	27.47	CC	1	1	0	1
51	45	45	26.52	HSIL	1	0	0	0
52	31.94	31.49	26.75	HSIL	1	1	1	1
53	35.31	35.81	26.44	LSIL	0	1	1	1
54	37.56	45	25.5	HSIL	1	1	0	1
55	45	45	26.49	HSIL	1	0	0	0
56	29.97	29.53	27.26	HSIL	1	1	1	1
66	45	45	27.99	LSIL	0	0	0	0
69	32.94	35.25	26.44	HSIL	1	1	1	1
71	31.87	29.38	26.36	HSIL	1	1	1	1
72	35.6	45	26.59	HSIL	1	1	0	1
76	33.1	32.69	25.61	LSIL	0	1	1	1
77	31.8	31.43	26.79	HSIL	1	1	1	1
81	45	37.89	26.52	HSIL	1	0	1	1
81	35.51	45	25.94	HSIL	1	1	0	1
82	32.82	32.72	26.88	HSIL	1	1	1	1
83	45	45	26.89	LSIL	0	0	0	0
84	45	45	27.34	LSIL	0	0	0	0
85	31.45	31.65	29.12	CC	1	1	1	1
86	32.77	31.14	28.53	CC	1	1	1	1
87	32.34	31.78	27.73	HSIL	1	1	1	1
88	45	45	27.22	HSIL	1	0	0	0
89	34.42	33.11	26.25	LSIL	0	1	1	1
91	43.33	45	27.13	LSIL	0	0	0	0
92	32.14	31.93	28.12	HSIL	1	1	1	1
94	31.76	31.51	26.38	HSIL	1	1	1	1
97	29.87	29.72	27.34	CC	1	1	1	1
98	33.6	31.68	26.36	HSIL	1	1	1	1
99	32.85	34.73	26.66	HSIL	1	1	1	1
113	33.11	32.35	26.52	HSIL	1	1	1	1
114	45	45	25.61	LSIL	0	0	0	0
116	32.21	31.8	26.23	HSIL	1	1	1	1
118	33.34	32.57	27.12	HSIL	1	1	1	1
119	35.93	45	25.52	LSIL	0	1	0	1
111	35.45	45	26.3	HSIL	1	1	0	1
112	32.69	32.25	26.52	LSIL	0	1	1	1
114	45	45	26.25	HSIL	1	0	0	0
115	34.33	45	26.18	LSIL	0	1	0	1
116	31.4	29.26	25.84	CC	1	1	1	1
117	45	45	26.4	HSIL	1	0	0	0
118	41.4	45	25.87	HSIL	1	0	0	0
119	45	45	25.78	Cervicitis	0	0	0	0
121	32.14	31.12	25.26	HSIL	1	1	1	1
122	31.98	29.36	27.53	CC	1	1	1	1
123	27.99	26.99	24.44	CC	1	1	1	1
124	29.45	31.96	26.72	CC	1	1	1	1
125	37.17	31.4	26.7	CC	1	1	1	1
127	33.18	32.31	26.95	HSIL	1	1	1	1
128	45	45	26.18	LSIL	0	0	0	0
129	45	45	26.13	HSIL	1	0	0	0
131	36.39	35.15	26.27	HSIL	1	1	1	1
131	45	45	24.82	HSIL	1	0	0	0
134	45	45	26.73	HSIL	1	0	0	0
138	35.85	36.75	25.44	HSIL	1	1	1	1
139	31.27	29.8	24.47	HSIL	1	1	1	1
141	31.26	29.38	26.34	CC	1	1	1	1
142	31.53	29.18	26.1	HSIL	1	1	1	1
143	28.98	27.45	24.9	CC	1	1	1	1
145	45	45	26.67	LSIL	0	0	0	0
146	31.19	31.35	26.32	HSIL	1	1	1	1
148	31.29	31.2	25.48	HSIL	1	1	1	1
151	28.99	28.63	23.72	LSIL	0	1	1	1
152	45	45	25.63	LSIL	0	0	0	0
153	37.88	45	24.5	LSIL	0	1	0	1
154	37.66	45	26.58	HSIL	1	1	0	1
156	34.15	32.56	27.35	LSIL	0	1	1	1
157	35.48	33.49	24.39	HSIL	1	1	1	1
161	36.11	45	26.31	HSIL	1	1	0	1
161	36.32	35.13	25.61	HSIL	1	1	1	1
162	35.23	35.44	24.92	HSIL	1	1	1	1
163	29.63	29.47	26.47	HSIL	1	1	1	1
166	35.56	31.74	26.95	HSIL	1	1	1	1
167	45	45	26.8	HSIL	1	0	0	0
168	36.47	45	26.52	HSIL	1	1	0	1
169	34.56	35.12	26.45	HSIL	1	1	1	1
171	45	45	26.6	Cervicitis	0	0	0	0
172	36.11	34.68	27.26	HSIL	1	1	1	1
173	45	45	26.11	HSIL	1	0	0	0
175	34.6	45	26.71	LSIL	0	1	0	1
176	34.67	33.28	26.82	HSIL	1	1	1	1
177	45	45	27.16	Cervicitis	0	0	0	0
178	35.62	35.29	27.96	HSIL	1	1	1	1
179	38.66	45	27.42	LSIL	0	0	0	0
181	34.11	41.54	24.39	HSIL	1	1	0	1
181	39.11	45	26.22	HSIL	1	0	0	0
182	45	45	27.11	LSIL	0	0	0	0
183	45	45	27.59	Cervicitis	0	0	0	0
184	39.59	45	26.2	LSIL	0	0	0	0
186	31.61	29.43	26.84	CC	1	1	1	1
187	45	45	26.39	Cervicitis	0	0	0	0
188	33.9	43.11	25.94	LSIL	0	1	0	1
191	44.19	45	27.19	HSIL	1	0	0	0
191	33.92	32.92	26.71	Cervicitis	0	1	1	1
193	34.16	32.13	27.11	LSIL	0	1	1	1
194	45	45	26.4	LSIL	0	0	0	0
195	28.75	28.14	26.29	CC	1	1	1	1
197	39.12	45	27.91	LSIL	0	0	0	0
198	38.34	45	26.47	LSIL	0	0	0	0
199	41.63	45	27.51	LSIL	0	0	0	0
211	28.15	27.35	25.47	CC	1	1	1	1
211	38.27	45	26.18	LSIL	0	0	0	0
212	37.12	45	27.35	HSIL	1	1	0	1
213	31.82	32.48	27.29	HSIL	1	1	1	1
214	32.42	32.26	26.13	HSIL	1	1	1	1
215	35.34	35.12	27.5	HSIL	1	1	1	1
216	36.23	45	24.7	HSIL	1	1	0	1
217	28.49	27.22	25.52	HSIL	1	1	1	1
219	35.88	31.46	26.13	HSIL	1	1	1	1
211	31.91	31.21	26.13	HSIL	1	1	1	1
212	31.57	31.52	25.21	HSIL	1	1	1	1
218	45	45	25.95	HSIL	1	0	0	0
219	45	45	27.72	HSIL	1	0	0	0
221	32.83	32.38	27.12	HSIL	1	1	1	1
221	32.73	31.27	26.54	HSIL	1	1	1	1
222	35.77	45	25.74	LSIL	0	1	0	1
223	37.73	45	25.52	HSIL	1	1	0	1
226	41.55	38.38	26.52	HSIL	1	0	1	1
228	45	45	25.45	HSIL	1	0	0	0
231	38.16	45	26.13	LSIL	0	0	0	0
231	42.11	45	26.76	HSIL	1	0	0	0
232	45	44.52	26.44	LSIL	0	0	0	0
234	41.12	45	25.92	LSIL	0	0	0	0
236	39.98	45	27.18	LSIL	0	0	0	0
237	38.58	45	27.35	LSIL	0	0	0	0
252	31.72	31.34	27.29	HSIL	1	1	1	1
253	36.74	45	26.43	LSIL	0	1	0	1
254	45	45	26.56	HSIL	1	0	0	0
255	33	31.95	26.69	HSIL	1	1	1	1
256	32.68	32.3	26.86	HSIL	1	1	1	1
257	37.82	45	25.65	HSIL	1	1	0	1
311	45	45	24.48	Cervicitis	0	0	0	0
313	45	45	25.18	Cervicitis	0	0	0	0
314	38.11	45	25.17	Cervicitis	0	0	0	0
316	44.95	45	26.13	Cervicitis	0	0	0	0
311	39.31	45	24.73	Cervicitis	0	0	0	0
314	38.51	45	26.76	Cervicitis	0	0	0	0
316	39.84	45	27.19	Cervicitis	0	0	0	0
319	45	45	26.12	Cervicitis	0	0	0	0
323	45	45	25.13	Cervicitis	0	0	0	0
324	37.65	45	26.49	Cervicitis	0	1	0	1
325	39.89	32.55	26.73	Cervicitis	0	0	1	1
326	45	45	24.12	Cervicitis	0	0	0	0
327	45	45	27.11	Cervicitis	0	0	0	0
328	45	45	24.24	Cervicitis	0	0	0	0
329	45	45	26.57	Cervicitis	0	0	0	0
331	45	39.17	25.17	Cervicitis	0	0	0	0
331	45	45	25.55	Cervicitis	0	0	0	0
332	45	45	25.19	Cervicitis	0	0	0	0
333	45	45	25.91	Cervicitis	0	0	0	0
337	35.58	35.79	26.92	Cervicitis	0	1	1	1
341	45	45	24.77	Cervicitis	0	0	0	0
341	44.12	39.38	26.85	Cervicitis	0	0	0	0
343	45	45	26.62	Cervicitis	0	0	0	0
344	45	45	25.53	Cervicitis	0	0	0	0
345	45	45	25.24	Cervicitis	0	0	0	0
346	45	45	25.14	Cervicitis	0	0	0	0
347	44.26	45	29.2	Cervicitis	0	0	0	0
348	45	45	27.11	Cervicitis	0	0	0	0
349	45	45	25.3	Cervicitis	0	0	0	0
351	44.59	45	26.8	Cervicitis	0	0	0	0
354	45	45	27.14	Cervicitis	0	0	0	0
355	45	45	25.83	Cervicitis	0	0	0	0
356	41.66	45	25.44	Cervicitis	0	0	0	0
357	35.87	45	26.67	Cervicitis	0	1	0	1
358	38.51	45	25.32	Cervicitis	0	0	0	0
361	45	45	28.33	Cervicitis	0	0	0	0
361	34.62	35.74	26.38	Cervicitis	0	1	1	1
362	45	45	26.53	Cervicitis	0	0	0	0
363	45	41.84	26.17	Cervicitis	0	0	0	0
364	36.85	45	25.96	Cervicitis	0	1	0	1
365	39.92	45	25.64	Cervicitis	0	0	0	0
367	45	45	26.14	Cervicitis	0	0	0	0
369	45	45	26.64	Cervicitis	0	0	0	0
371	42.32	45	25.84	Cervicitis	0	0	0	0
371	45	45	28.37	Cervicitis	0	0	0	0
372	45	45	25.2	Cervicitis	0	0	0	0
373	45	45	25.89	Cervicitis	0	0	0	0
374	41.65	45	25.77	Cervicitis	0	0	0	0
375	45	45	25.7	Cervicitis	0	0	0	0
377	45	45	26.46	Cervicitis	0	0	0	0
378	45	45	26.24	Cervicitis	0	0	0	0
379	45	45	25.53	Cervicitis	0	0	0	0
381	45	45	28.38	Cervicitis	0	0	0	0
381	45	45	25.7	Cervicitis	0	0	0	0
382	45	45	26.38	Cervicitis	0	0	0	0
383	45	45	26.18	Cervicitis	0	0	0	0
385	45	45	25.99	Cervicitis	0	0	0	0
387	45	45	25.95	Cervicitis	0	0	0	0
388	45	45	25.11	Cervicitis	0	0	0	0
389	45	45	26.54	Cervicitis	0	0	0	0
393	45	45	26.78	Cervicitis	0	0	0	0
394	45	45	28.54	Cervicitis	0	0	0	0
395	45	45	28.34	Cervicitis	0	0	0	0
396	45	45	27.56	Cervicitis	0	0	0	0
397	45	45	27.52	Cervicitis	0	0	0	0
398	45	45	28.32	Cervicitis	0	0	0	0
411	45	45	27.75	Cervicitis	0	0	0	0
413	45	45	28.57	Cervicitis	0	0	0	0
415	45	45	26.44	Cervicitis	0	0	0	0
416	39.87	45	25.99	Cervicitis	0	0	0	0
417	45	45	25.44	Cervicitis	0	0	0	0
418	45	45	26.97	Cervicitis	0	0	0	0
419	45	45	27.18	Cervicitis	0	0	0	0
411	45	45	27.62	Cervicitis	0	0	0	0
411	45	45	25.16	Cervicitis	0	0	0	0
412	45	45	25.65	Cervicitis	0	0	0	0
413	45	45	25.81	Cervicitis	0	0	0	0
414	45	45	26.15	Cervicitis	0	0	0	0
415	45	45	26.42	Cervicitis	0	0	0	0
416	35.37	34.58	26.99	Cervicitis	0	1	1	1
418	45	45	26.19	Cervicitis	0	0	0	0
419	45	45	26.8	Cervicitis	0	0	0	0
421	43.19	45	25.37	Cervicitis	0	0	0	0
421	45	45	25.8	Cervicitis	0	0	0	0
422	45	45	25.74	Cervicitis	0	0	0	0
423	45	45	25.9	Cervicitis	0	0	0	0
426	45	45	26.43	Cervicitis	0	0	0	0
427	45	45	25.83	Cervicitis	0	0	0	0
428	45	45	26.37	Cervicitis	0	0	0	0
429	45	45	27.4	Cervicitis	0	0	0	0
431	45	45	26.19	Cervicitis	0	0	0	0
431	45	45	26.58	Cervicitis	0	0	0	0
432	45	45	27.35	Cervicitis	0	0	0	0
434	45	45	25.79	Cervicitis	0	0	0	0
436	41.99	45	26.96	Cervicitis	0	0	0	0
437	45	45	26.18	Cervicitis	0	0	0	0
438	45	45	26.69	Cervicitis	0	0	0	0
439	32.4	37.11	26.7	Cervicitis	0	1	1	1
441	41.51	45	26.4	Cervicitis	0	0	0	0
442	45	45	26.33	Cervicitis	0	0	0	0
443	45	45	26.7	Cervicitis	0	0	0	0
447	41.53	45	25.84	Cervicitis	0	0	0	0
448	45	45	25.92	Cervicitis	0	0	0	0
451	45	45	26.19	Cervicitis	0	0	0	0
453	41.67	45	26.29	Cervicitis	0	0	0	0
454	45	45	26.18	Cervicitis	0	0	0	0
455	45	45	25.82	Cervicitis	0	0	0	0
456	45	45	26.95	Cervicitis	0	0	0	0
461	41.62	45	25.74	Cervicitis	0	0	0	0
461	41.92	45	26.16	Cervicitis	0	0	0	0
462	45	45	25.15	Cervicitis	0	0	0	0
464	45	45	26.61	Cervicitis	0	0	0	0
465	45	45	25.68	Cervicitis	0	0	0	0
467	45	45	26.76	Cervicitis	0	0	0	0
469	43.17	45	26.11	Cervicitis	0	0	0	0
471	45	45	26.99	Cervicitis	0	0	0	0
472	45	45	25.95	Cervicitis	0	0	0	0
473	45	45	26.74	Cervicitis	0	0	0	0
474	45	45	25	Cervicitis	0	0	0	0
475	45	45	26.17	Cervicitis	0	0	0	0
476	45	45	26.34	Cervicitis	0	0	0	0
478	45	45	25.87	Cervicitis	0	0	0	0
481	45	45	25.22	Cervicitis	0	0	0	0
481	45	45	26.21	Cervicitis	0	0	0	0
482	41.52	45	25.91	Cervicitis	0	0	0	0
483	45	45	25.87	Cervicitis	0	0	0	0
484	45	45	26.1	Cervicitis	0	0	0	0
485	45	45	26.11	Cervicitis	0	0	0	0
487	37.55	45	26.5	Cervicitis	0	1	0	1
489	45	45	27.28	Cervicitis	0	0	0	0
491	41.67	45	26.1	Cervicitis	0	0	0	0
492	45	45	25.79	Cervicitis	0	0	0	0
493	45	45	25.87	Cervicitis	0	0	0	0
495	45	43.11	25.92	Cervicitis	0	0	0	0
497	45	45	26.3	Cervicitis	0	0	0	0
499	45	45	25.95	Cervicitis	0	0	0	0
511	45	45	26.13	Cervicitis	0	0	0	0
511	45	45	28.91	Cervicitis	0	0	0	0
512	39.68	45	26.31	Cervicitis	0	0	0	0
513	45	45	26.45	Cervicitis	0	0	0	0
514	45	45	24.99	Cervicitis	0	0	0	0
515	38.63	45	26.98	Cervicitis	0	0	0	0
516	38.74	45	25.46	Cervicitis	0	0	0	0
517	33.46	32.43	27.95	Cervicitis	0	1	1	1
518	38.17	45	26.89	Cervicitis	0	0	0	0
519	45	45	26.21	Cervicitis	0	0	0	0
511	45	45	28.45	Cervicitis	0	0	0	0
512	45	45	27.29	Cervicitis	0	0	0	0
513	36.12	35.15	27.15	Cervicitis	0	1	1	1
514	45	45	28.28	Cervicitis	0	0	0	0
515	45	45	26.31	Cervicitis	0	0	0	0
518	45	45	29.39	Cervicitis	0	0	0	0
519	45	45	26.44	Cervicitis	0	0	0	0
521	45	45	27.4	Cervicitis	0	0	0	0
522	34.32	34.5	26.31	Cervicitis	0	1	1	1
523	38.29	45	27.12	Cervicitis	0	0	0	0
524	45	45	25.6	Cervicitis	0	0	0	0
525	38.65	45	26.91	Cervicitis	0	0	0	0
526	45	45	28.12	Cervicitis	0	0	0	0
527	45	45	28.3	Cervicitis	0	0	0	0
529	45	45	27.12	Cervicitis	0	0	0	0
531	45	45	27.76	Cervicitis	0	0	0	0
531	45	45	29.11	Cervicitis	0	0	0	0
532	45	45	27.88	Cervicitis	0	0	0	0
533	45	45	26.56	Cervicitis	0	0	0	0
534	42.82	45	26.27	Cervicitis	0	0	0	0
535	38.61	45	26.81	Cervicitis	0	0	0	0
536	41.26	45	28.55	Cervicitis	0	0	0	0
537	42.17	45	27.84	Cervicitis	0	0	0	0
538	41.84	45	27.18	Cervicitis	0	0	0	0
539	45	45	27.77	Cervicitis	0	0	0	0
541	39.76	36.92	27.69	Cervicitis	0	0	1	1
541	45	45	28.13	Cervicitis	0	0	0	0
542	39.55	45	26.73	Cervicitis	0	0	0	0
543	41.77	45	26.6	Cervicitis	0	0	0	0
544	37.95	45	26.92	Cervicitis	0	1	0	1
545	45	45	27.76	Cervicitis	0	0	0	0
546	38	45	26.83	Cervicitis	0	1	0	1
547	45	45	27.43	Cervicitis	0	0	0	0
548	45	45	27.62	Cervicitis	0	0	0	0
549	45	45	27.61	Cervicitis	0	0	0	0
551	45	45	28.29	Cervicitis	0	0	0	0
553	45	45	26.3	Cervicitis	0	0	0	0
554	39.96	45	27.16	Cervicitis	0	0	0	0
555	36.46	35	27.68	Cervicitis	0	1	1	1
556	39.56	45	26	Cervicitis	0	0	0	0
557	41.97	45	25.83	Cervicitis	0	0	0	0
558	41.93	41.92	26.33	Cervicitis	0	0	0	0
563	38.61	45	26.74	Cervicitis	0	0	0	0
564	45	45	26.54	Cervicitis	0	0	0	0
566	38.72	45	26.23	Cervicitis	0	0	0	0
567	45	45	26.42	Cervicitis	0	0	0	0
571	45	45	26.72	Cervicitis	0	0	0	0
571	45	45	29.47	Cervicitis	0	0	0	0
572	45	45	27.14	Cervicitis	0	0	0	0
574	45	45	26.17	Cervicitis	0	0	0	0
575	35.38	45	25.99	Cervicitis	0	1	0	1
576	36.59	45	27.23	Cervicitis	0	1	0	1
578	45	45	25.93	Cervicitis	0	0	0	0
579	36.94	45	26.14	Cervicitis	0	1	0	1
581	44.59	45	26.2	Cervicitis	0	0	0	0
582	45	45	25.77	Cervicitis	0	0	0	0
585	32.52	28.98	26.27	HSIL	1	1	1	1
587	36.53	33.87	25.98	HSIL	1	1	1	1
589	31.29	31.31	25.99	HSIL	1	1	1	1
591	45	45	25.93	HSIL	1	0	0	0
592	42.83	45	25.87	HSIL	1	0	0	0
593	39.63	45	25.67	HSIL	1	0	0	0
594	38.71	45	25.26	LSIL	0	0	0	0
595	33.11	34.83	25.54	HSIL	1	1	1	1
596	29.86	29.9	25.63	HSIL	1	1	1	1
597	36	45	26.8	HSIL	1	1	0	1
598	33.58	45	25.89	LSIL	0	1	0	1
599	29.42	29.36	25.76	HSIL	1	1	1	1
611	43.75	45	25.85	HSIL	1	0	0	0
611	45	45	25.73	HSIL	1	0	0	0
614	28.62	28.33	25.52	CC	1	1	1	1
617	31.64	31.29	25.74	CC	1	1	1	1
618	45	45	25.88	Cervicitis	0	0	0	0
613	28.53	27.41	25.41	CC	1	1	1	1
614	28.59	28.43	25.82	CC	1	1	1	1
621	32.19	31.2	26.23	CC	1	1	1	1
622	28.99	29.16	25.46	CC	1	1	1	1
625	28.22	28.1	25.52	CC	1	1	1	1
627	28.87	26.58	25.34	CC	1	1	1	1
631	43.18	45	26.82	Cervicitis	0	0	0	0
634	38.54	45	27.93	Cervicitis	0	0	0	0
635	45	45	27.74	Cervicitis	0	0	0	0
637	45	45	28.63	Cervicitis	0	0	0	0
638	45	45	26.77	Cervicitis	0	0	0	0
639	44.6	45	27.99	Cervicitis	0	0	0	0
641	41.88	37.77	27.57	Cervicitis	0	0	1	1
641	45	45	26.91	Cervicitis	0	0	0	0
642	45	45	26.47	Cervicitis	0	0	0	0
643	45	45	27.66	Cervicitis	0	0	0	0
644	45	37.46	27.13	Cervicitis	0	0	1	1
645	45	45	28.48	Cervicitis	0	0	0	0
648	45	45	27.72	Cervicitis	0	0	0	0
649	41.83	45	26.85	Cervicitis	0	0	0	0
651	35.98	45	31.37	Cervicitis	0	1	0	1
652	45	45	28.46	Cervicitis	0	0	0	0
653	45	45	28.14	Cervicitis	0	0	0	0
654	45	45	28.2	Cervicitis	0	0	0	0
655	45	45	29.45	Cervicitis	0	0	0	0
656	38.82	45	27.96	Cervicitis	0	0	0	0
657	45	45	28.47	Cervicitis	0	0	0	0
659	45	45	27.56	Cervicitis	0	0	0	0
661	45	45	28.92	Cervicitis	0	0	0	0
661	45	45	29.47	Cervicitis	0	0	0	0
662	45	45	27.94	Cervicitis	0	0	0	0
663	45	45	27.65	Cervicitis	0	0	0	0
664	45	45	27.27	Cervicitis	0	0	0	0
665	45	45	24.85	Cervicitis	0	0	0	0
666	45	45	27.19	Cervicitis	0	0	0	0
667	45	45	29.65	Cervicitis	0	0	0	0
668	45	45	26.48	Cervicitis	0	0	0	0
669	45	45	26.31	Cervicitis	0	0	0	0
671	45	45	26.29	Cervicitis	0	0	0	0
671	45	45	26.29	Cervicitis	0	0	0	0
672	41.69	45	26.92	Cervicitis	0	0	0	0
673	45	45	26.23	Cervicitis	0	0	0	0
674	45	45	25.88	Cervicitis	0	0	0	0
675	45	45	28.6	Cervicitis	0	0	0	0
676	41.26	45	28.64	Cervicitis	0	0	0	0
677	45	45	28.94	Cervicitis	0	0	0	0
678	45	45	31.11	Cervicitis	0	0	0	0
681	36.7	43.19	28.56	Cervicitis	0	1	0	1
681	45	45	29.26	Cervicitis	0	0	0	0
682	45	45	29.96	Cervicitis	0	0	0	0
683	45	45	26.16	Cervicitis	0	0	0	0
684	38.92	45	27.42	Cervicitis	0	0	0	0
685	45	45	28.17	Cervicitis	0	0	0	0
686	45	45	27.63	Cervicitis	0	0	0	0
687	45	45	27.13	Cervicitis	0	0	0	0
688	38.27	45	26.39	Cervicitis	0	0	0	0
689	45	39.74	27.16	Cervicitis	0	0	0	0
691	42.89	45	29.84	Cervicitis	0	0	0	0
691	45	45	26.72	Cervicitis	0	0	0	0
692	45	45	27.39	Cervicitis	0	0	0	0
694	42.35	45	27.18	Cervicitis	0	0	0	0
695	41.11	45	28.69	Cervicitis	0	0	0	0
696	38.61	45	27.11	Cervicitis	0	0	0	0
697	45	45	27.77	Cervicitis	0	0	0	0
699	45	45	26.46	Cervicitis	0	0	0	0
711	45	45	26.76	Cervicitis	0	0	0	0
712	45	45	27.73	Cervicitis	0	0	0	0
713	45	45	29.61	Cervicitis	0	0	0	0
715	37.14	45	25.81	Cervicitis	0	1	0	1
716	45	45	25.8	Cervicitis	0	0	0	0
717	45	45	27.68	Cervicitis	0	0	0	0
718	45	45	26.3	Cervicitis	0	0	0	0
719	31.66	29.86	27.49	Cervicitis	0	1	1	1
711	45	45	26.79	Cervicitis	0	0	0	0
711	45	39.19	26.48	Cervicitis	0	0	0	0
712	45	39.75	26.67	Cervicitis	0	0	0	0
713	45	45	25.79	Cervicitis	0	0	0	0
714	45	45	26.63	Cervicitis	0	0	0	0
715	41.78	45	25.86	Cervicitis	0	0	0	0
716	45	45	28.13	Cervicitis	0	0	0	0
717	45	45	28.12	Cervicitis	0	0	0	0
719	45	45	31.95	Cervicitis	0	0	0	0
721	38.34	38.77	26.94	Cervicitis	0	0	0	0
721	45	45	28.11	Cervicitis	0	0	0	0
722	45	45	29.4	Cervicitis	0	0	0	0
723	45	45	27.22	Cervicitis	0	0	0	0
724	45	45	26.28	Cervicitis	0	0	0	0
725	45	45	27.97	Cervicitis	0	0	0	0
726	45	45	26.79	Cervicitis	0	0	0	0
728	45	45	27.67	Cervicitis	0	0	0	0
729	39.23	45	26.43	Cervicitis	0	0	0	0
731	45	45	27.27	Cervicitis	0	0	0	0
734	33.93	32.19	26.93	HSIL	1	1	1	1
735	38.49	45	26.38	HSIL	1	0	0	0
738	45	45	26.61	LSIL	0	0	0	0
741	32.3	31.64	26.89	LSIL	0	1	1	1
742	38.96	45	26.63	HSIL	1	0	0	0
743	41.29	45	26.61	LSIL	0	0	0	0
745	28.94	28.7	26.79	CC	1	1	1	1
747	38.38	35.58	26.5	LSIL	0	0	1	1
749	32.5	32.15	26.75	HSIL	1	1	1	1
751	34.47	35.45	25.79	HSIL	1	1	1	1
751	38.46	45	26.76	LSIL	0	0	0	0
1)The missing number was eliminated according to the standard of sample requirement.
2)Cytological diagnosis includes cervicitis, LSIL(low-grade squamous intraepithelial lesion),HSIL(high-grade squamous intraepithelial lesion) and CC(cervical cancer);State variable is 1 for positive and 0 for negative.
3)PCR diagnosis: 1 refers to positive and 0 refers to negative.
